# Supplementary material for: Multi-omics reveals that the rumen microbiome and its metabolome together with the host metabolome contribute to individualized dairy cow performance
Source: PubMed Central journal article supplement (PMC7218573; doi:10.1186/s40168-020-00819-8), 2020-05-12

A

| Serum metabolites higher in HH cows |                                                                                      |
|-------------------------------------|--------------------------------------------------------------------------------------|
| 1 Acids, Heterocyclic               | Nicotinamide                                                                         |
|                                     | Serine, L-Allothreonine, Asparagine, Creatine dehydratase, Trans-4-hydroxy-L-proline |
| 5 Amino Acids                       | DL-dihydrospingosine                                                                 |
| 1 Amino Alcohols                    | N-ethylmaleamic acid                                                                 |
| 1 Carboxylic Acids                  | Cyclohexane-1,2-diol                                                                 |
| 1 Fatty Alcohols                    | Cytidine-monophosphate dehydratase prod., Salicin                                    |
| 2 Glycosides                        | Uracil                                                                               |
| 1 Heterocyclic Compounds            | Allantoinic acid, Oxoproline, Palatinol                                              |
| 3 Others                            | Abietic acid                                                                         |
| 1 Pharmacologic Actions             | Fructose                                                                             |
| 1 Sugars                            | D-glycerol 1-phosphate, Beta-Glycerophosphoric acid                                  |
| 2 Sugar Alcohols                    |                                                                                      |

| Serum metabolites higher in LL cows |                                                                    |
|-------------------------------------|--------------------------------------------------------------------|
| 1 Acids, Carbocyclic                | 3,4-Dihydroxymandellic acid                                        |
| 1 Amino Acids                       | Sarcosine                                                          |
|                                     | Phthalic acid, 3-hydroxyphenylacetic acid, Alpha-ketoglutaric acid |
| 3 Carboxylic Acids                  | Alpha-ketoglutaric acid                                            |
| 1 Fatty Acids                       | Pelargonic acid                                                    |
| 1 Hydrocarbons                      | Picotannol                                                         |
| 1 Peptides                          | Glutathione-H <sub>2</sub> O                                       |
| 2 Pharmacologic Actions             | Resveratrol, Alpha-Santonin                                        |
| 1 Toxic Actions                     | 1-Hydroxyanthraquinone                                             |

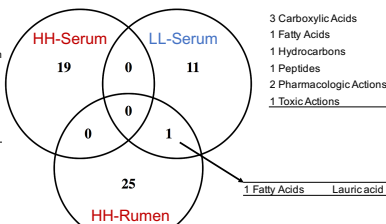

### Rumen metabolites higher in HH cows

|                            |                                                                                    |
|----------------------------|------------------------------------------------------------------------------------|
| 1 Acids, Noncarboxylic     | Phosphate                                                                          |
| 1 Amides                   | Epsilon-Caprolactam                                                                |
|                            | Nepsilon-Trimethyllysine, 3-ureidopropionate, Oxamic acid, 3-1-Pyrazolyl-L-alanine |
| 4 Amino Acids              | Glucosaminic acid                                                                  |
| 1 Amino Sugars             | Cinnamic acid, Pimelic acid, Beta-hydroxypropionate, Fumaric acid, Sinapyl alcohol |
| 5 Carboxylic Acids         | Pyridoxal phosphate                                                                |
| 1 Coenzymes                | Pentadecanoic acid                                                                 |
| 1 Fatty Acids              | Prostaglandin E2, Trans,trans-Muonic acid                                          |
| 2 Fatty Acids, Unsaturated | Resorcinol, Phthalic acid                                                          |
| 2 Hydrocarbons             | D-galacturonic acid                                                                |
| 1 Polysaccharides          | D-Glycercic acid, 6-phosphogluconic acid, Gluconic acid                            |
| 3 Sugar Acids              | D-Glycercic acid, 6-phosphogluconic acid, Gluconic acid                            |
| 2 Sugars                   | Glucose, Tagatose                                                                  |

B

### Serum metabolic pathways enriched in HH cows

Methane metabolism  
Nicotinate and nicotinamide metabolism  
Sphingolipid metabolism  
Aminocyl-rRNA biosynthesis  
Arginine and proline metabolism  
Glycerophospholipid metabolism  
Cysteine and methionine metabolism  
Glutathione metabolism  
Purine metabolism

### Glycine, serine and threonine metabolism

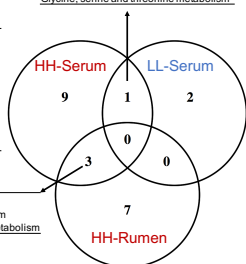

### Rumen metabolic pathways enriched in HH cows

Vitamin B6 metabolism  
beta-Alanine metabolism  
Pentose phosphate pathway  
Pantothenate and CoA biosynthesis  
Galactose metabolism  
Citrate cycle (TCA cycle)  
Alanine, aspartate and glutamate metabolism

### Serum metabolic pathways enriched in LL cows

Valine, leucine and isoleucine degradation  
Tyrosine metabolism

C

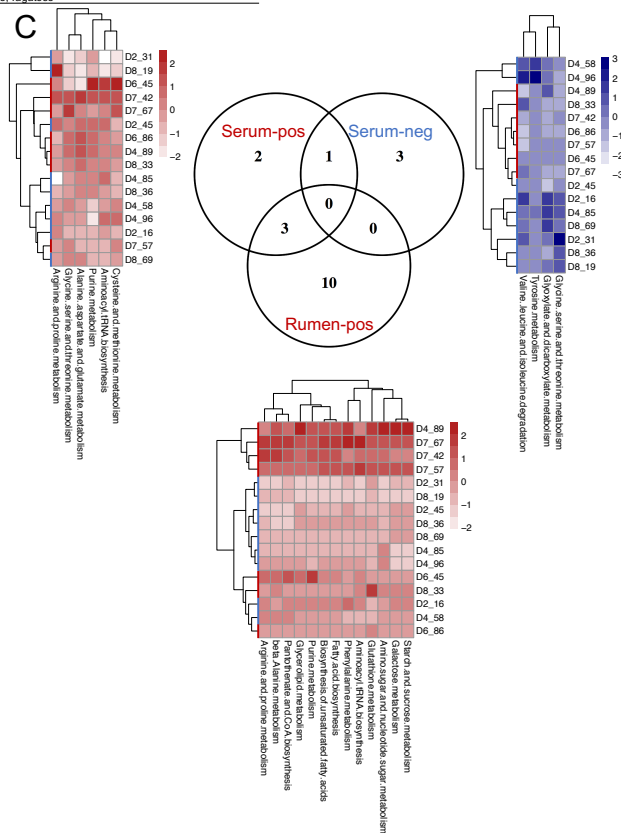

Supplement: 40168_2020_819_MOESM16_ESM.pdf [file 40168_2020_819_MOESM16_ESM.pdf]
