# Supplementary material for: Multi-omics reveals that the rumen microbiome and its metabolome together with the host metabolome contribute to individualized dairy cow performance
Source: PubMed Central journal article supplement (PMC7218573; doi:10.1186/s40168-020-00819-8), 2020-05-12

A

## Wilcoxon rank-sum test on Phylum level

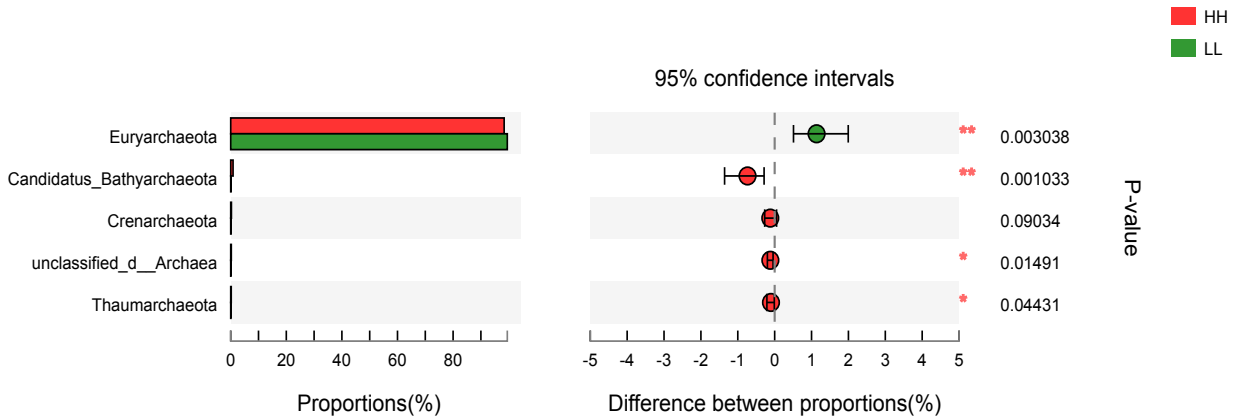

B

## Wilcoxon rank-sum test on Genus level

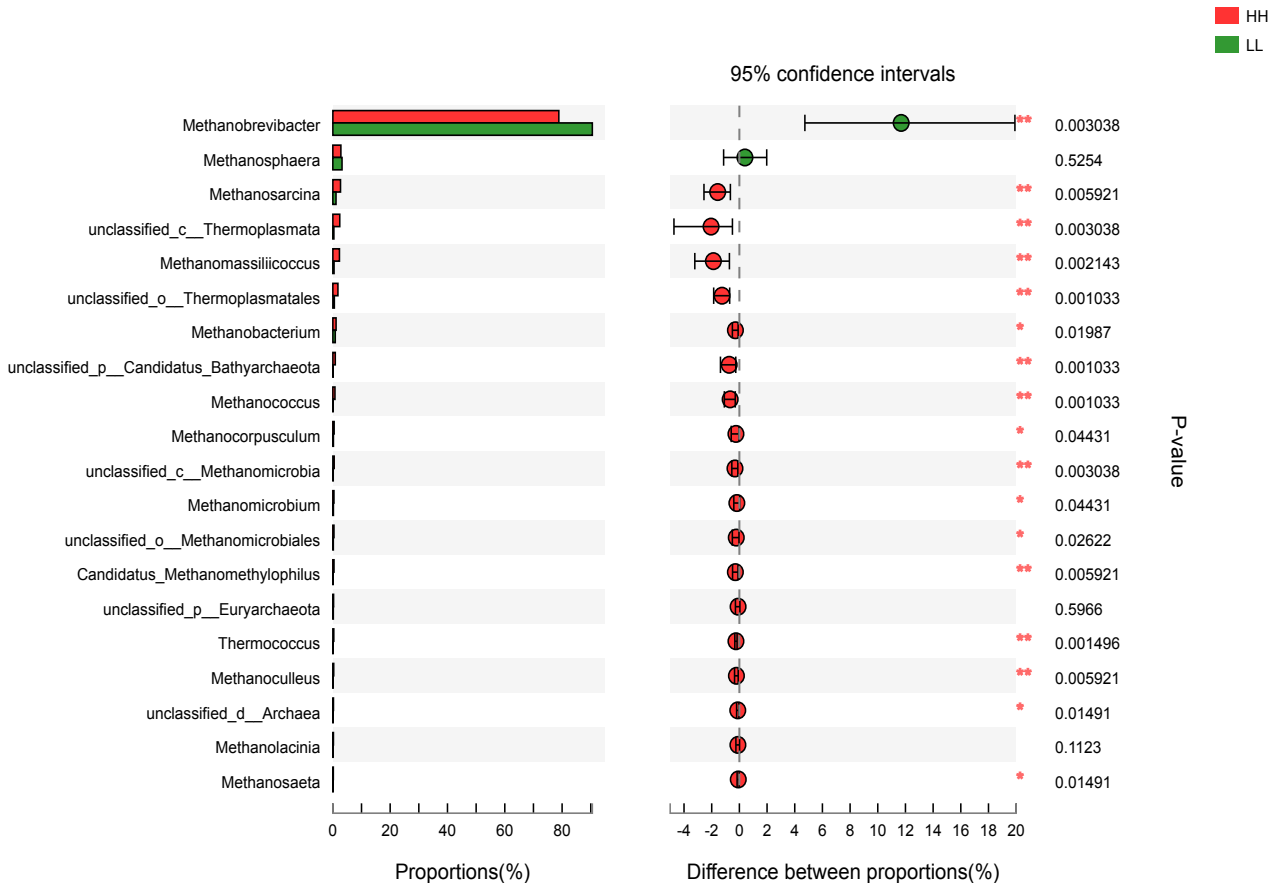

Supplement: 40168_2020_819_MOESM7_ESM.pdf [file 40168_2020_819_MOESM7_ESM.pdf]
