# Supplementary material for: Multi-omics reveals that the rumen microbiome and its metabolome together with the host metabolome contribute to individualized dairy cow performance
Source: Microbiome. 2020 May 12;8:64. doi: 10.1186/s40168-020-00819-8 (PMC7218573; doi:10.1186/s40168-020-00819-8)
Supplement: Supplementary file 14 — Additional file 13: Table S6. Phenotype (MPY)-associated metabolites in rumen. [file 40168_2020_819_MOESM13_ESM.xlsx]

## Sheet: Rumen MPY-metabotypes
Table S6. Phenotype (MPY)-associated metabolites in rumen
Metabolites	correlation coefficient (R)			P value			Microbiome-responsive metabotypes
	Milk yield	Protein content	Milk protein yield	Milk yield	Protein content	Milk protein yield
phloretin	0.84118	0.83591	0.87059	4.4429e-05	5.501e-05	1.1499e-05	Yes
3-hydroxyphenylacetic acid	0.77059	0.87417	0.84706	0.00047682	9.5406e-06	3.468e-05	Yes
3-hydroxybenzoic acid	0.73235	0.94923	0.78529	0.001255	2.0382e-08	0.00031285	Yes
Thymol	0.72647	0.87123	0.77353	0.0014362	1.1126e-05	0.00043936	Yes
trans,trans-Muconic acid	0.75294	0.86829	0.77353	0.00076108	1.2927e-05	0.00043936	Yes
1,3-diaminopropane	0.71176	0.83002	0.75882	0.001984	6.9247e-05	0.00065403	Yes
Lignoceric acid	0.65882	0.93304	0.75588	0.0055114	1.3542e-07	0.00070589	Yes
3-(1-Pyrazolyl)-L-alanine	0.67941	0.83149	0.73824	0.0037934	6.5428e-05	0.0010929	Yes
Methylmalonic acid	0.66471	0.91096	0.73529	0.0049674	9.3741e-07	0.0011716	Yes
N-(2-hydroxyethyl)-iminodiacetic acid	0.67647	0.89478	0.73529	0.0040083	2.8879e-06	0.0011716	Yes
Tartronic acid	0.63824	0.91538	0.72941	0.0078011	6.6455e-07	0.0013431	Yes
salicylic acid	0.66176	0.93157	0.72941	0.0052338	1.5706e-07	0.0013431	Yes
N-Acetyl-L-aspartic acid	0.66471	0.65489	0.72941	0.0049674	0.0059007	0.0013431	No
phosphate	0.72941	0.73584	0.72353	0.0013431	0.0011568	0.0015345	Yes
canavanine degr prod	0.63235	0.88889	0.71765	0.0085776	4.1596e-06	0.0017475	Yes
Pelargonic acid	0.63824	0.92274	0.71765	0.0078011	3.5862e-07	0.0017475	Yes
resorcinol	0.66471	0.8521	0.71765	0.0049674	2.782e-05	0.0017475	Yes
epsilon-Caprolactam	0.65294	0.77557	0.71471	0.006102	0.00041481	0.0018627	Yes
3-ureidopropionate	0.68235	0.80206	0.71176	0.003588	0.00018577	0.001984	Yes
Dodecanol	0.64412	0.85504	0.70588	0.0070815	2.4368e-05	0.0022459	Yes
D-(glycerol-phosphate)	0.62353	0.91685	0.7	0.0098557	5.9011e-07	0.0025351	Yes
Prostaglandin E2	0.60294	0.86829	0.69412	0.013424	1.2927e-05	0.0028537	Yes
4-hydroxybutyrate	0.61765	0.8521	0.69118	0.010788	2.782e-05	0.0030247	Yes
proline	0.62353	0.86387	0.69118	0.0098557	1.6085e-05	0.0030247	Yes
Tagatose	0.63529	0.91096	0.69118	0.0081821	9.3741e-07	0.0030247	Yes
adenine	0.60882	0.8624	0.69118	0.012315	1.7271e-05	0.0030247	Yes
lipoic acid	0.61176	0.87123	0.69118	0.011788	1.1126e-05	0.0030247	Yes
stearic acid	0.60294	0.86976	0.69118	0.013424	1.1998e-05	0.0030247	Yes
N-cyclohexylformamide	0.6	0.87564	0.68529	0.014007	8.8222e-06	0.0033916	Yes
4-Hydroxy-6-methyl-2-pyrone	0.6	0.87564	0.68529	0.014007	8.8222e-06	0.0033916	Yes
Maleamate	0.6	0.87564	0.68529	0.014007	8.8222e-06	0.0033916	Yes
gluconic acid	0.61471	0.88447	0.68529	0.011279	5.3981e-06	0.0033916	Yes
palmitic acid	0.6	0.87564	0.68529	0.014007	8.8222e-06	0.0033916	Yes
benzoic acid	0.58824	0.92715	0.67941	0.01654	2.4041e-07	0.0037934	Yes
2-amino-2-methylpropane-1,3-diol	0.57941	0.84032	0.67647	0.018663	4.6015e-05	0.0040083	Yes
fructose-6-phosphate	0.58529	0.87417	0.67647	0.017225	9.5406e-06	0.0040083	Yes
tetracosane	0.59412	0.86829	0.67647	0.015232	1.2927e-05	0.0040083	Yes
Lactamide	0.59412	0.82119	0.67353	0.015232	9.6281e-05	0.0042327	Yes
adipic acid	0.58529	0.89183	0.67353	0.017225	3.4749e-06	0.0042327	Yes
phenylacetaldehyde	0.58235	0.87712	0.67059	0.017933	8.1499e-06	0.0044672	Yes
hydroxyurea	0.58529	0.86976	0.67059	0.017225	1.1998e-05	0.0044672	Yes
2,2-Dimethylsuccinic Acid	0.58529	0.86976	0.67059	0.017225	1.1998e-05	0.0044672	Yes
Glucose-1-phosphate	0.59118	0.805	0.67059	0.015876	0.00016869	0.0044672	Yes
Myristic Acid	0.57059	0.89036	0.67059	0.020991	3.8043e-06	0.0044672	Yes
3-Aminoisobutyric acid	0.58529	0.80942	0.66765	0.017225	0.00014551	0.004712	Yes
beta-Hydroxymyristic acid	0.63235	0.66667	0.66765	0.0085776	0.0047959	0.004712	No
2-Butyne-1,4-diol	0.64118	0.81383	0.66471	0.0074344	0.00012505	0.0049674	Yes
putrescine	0.68235	0.66225	0.66176	0.003588	0.0051889	0.0052338	Yes
pyridoxal phosphate	0.64118	0.81972	0.66176	0.0074344	0.00010154	0.0052338	Yes
Chlorogenic Acid	0.56471	0.81972	0.66176	0.022663	0.00010154	0.0052338	No
2-Ketovaleric acid	0.56765	0.86387	0.65882	0.021815	1.6085e-05	0.0055114	Yes
beta-hydroxypyruvate	0.60588	0.79912	0.65882	0.01286	0.00020427	0.0055114	Yes
Glutaric Acid	0.58235	0.83885	0.65882	0.017933	4.8865e-05	0.0055114	Yes
tartaric acid	0.57353	0.8727	0.65882	0.020191	1.0308e-05	0.0055114	Yes
glutaraldehyde	0.56176	0.84032	0.65294	0.023537	4.6015e-05	0.006102	Yes
Phytanic acid	0.55	0.82708	0.65294	0.027294	7.7444e-05	0.006102	Yes
glycerol	0.56176	0.87564	0.65	0.023537	8.8222e-06	0.0064157	Yes
ornithine	0.60588	0.72553	0.65	0.01286	0.0014669	0.0064157	Yes
hexadecane	0.58824	0.76821	0.64706	0.01654	0.00050898	0.0067421	Yes
Maleimide	0.62059	0.55629	0.64412	0.010314	0.025232	0.0070815	Yes
malonic acid	0.56765	0.805	0.64412	0.021815	0.00016869	0.0070815	Yes
hydrocortisone	0.59118	0.83149	0.64412	0.015876	6.5428e-05	0.0070815	Yes
2-hydroxypyridine	0.55	0.8418	0.64118	0.027294	4.3306e-05	0.0074344	Yes
sulfuric acid	0.55882	0.83591	0.64118	0.024437	5.501e-05	0.0074344	Yes
3-Hydroxypyridine	0.54118	0.90949	0.63824	0.0304	1.0472e-06	0.0078011	Yes
Methyl Phosphate	0.6	0.79912	0.63529	0.014007	0.00020427	0.0081821	Yes
N-Ethylglycine	0.55588	0.82414	0.63529	0.025362	8.6436e-05	0.0081821	Yes
4-Acetylbutyric acid	0.53824	0.84915	0.63529	0.031493	3.1673e-05	0.0081821	Yes
1,3-Cyclohexanedione	0.55882	0.82266	0.63235	0.024437	9.1248e-05	0.0085776	Yes
Glycine-d5	0.54706	0.85946	0.63235	0.028301	1.9866e-05	0.0085776	Yes
2,3-Dimethylsuccinic acid	0.54706	0.85946	0.63235	0.028301	1.9866e-05	0.0085776	Yes
L-Dithiothreitol	0.54412	0.86093	0.62941	0.029336	1.8531e-05	0.0089881	Yes
Farnesal 6	0.53529	0.89919	0.62941	0.032616	2.1653e-06	0.0089881	Yes
N-Acetyl-beta-D-mannosamine	0.56176	0.82414	0.62647	0.023537	8.6436e-05	0.009414	Yes
xanthurenic acid	0.52059	0.85063	0.62647	0.038691	2.9694e-05	0.009414	Yes
heptadecanoic acid	0.51176	0.84327	0.62353	0.042723	4.0731e-05	0.0098557	Yes
Atrazine-2-hydroxy	0.54412	0.83738	0.61471	0.029336	5.1861e-05	0.011279	Yes
Aconitic Acid	0.51471	0.84915	0.61176	0.041346	3.1673e-05	0.011788	Yes
5-Hydroxyindole-2-carboxylic acid	0.50588	0.89183	0.61176	0.045582	3.4749e-06	0.011788	Yes
Arachidic acid	0.49706	0.8521	0.61176	0.050134	2.782e-05	0.011788	Yes
Sinapyl alcohol	0.57647	0.76968	0.60882	0.019415	0.00048886	0.012315	No
5,6-dihydrouracil	0.51765	0.86681	0.60588	0.040002	1.3916e-05	0.01286	Yes
cycloleucine	0.54706	0.45327	0.60294	0.028301	0.077852	0.013424	No
glucose-6-phosphate	0.54118	0.51361	0.60294	0.0304	0.041854	0.013424	No
N(epsilon)-Trimethyllysine	0.57059	0.7947	0.6	0.020991	0.00023487	0.014007	Yes
pimelic acid	0.51765	0.82266	0.59706	0.040002	9.1248e-05	0.01461	Yes
oxamic acid	0.49118	0.89625	0.59412	0.05335	2.6273e-06	0.015232	Yes
xylitol	0.52059	0.69316	0.59412	0.038691	0.0029087	0.015232	No
5-Aminoimidazole-4-carboxamide	0.53235	0.76527	0.59412	0.033769	0.00055127	0.015232	Yes
N-formyl-L-methionine	0.49412	0.8624	0.59118	0.051723	1.7271e-05	0.015876	Yes
caprylic acid	0.47647	0.81089	0.58824	0.062059	0.00013841	0.01654	Yes
Aminomalonic acid	0.48235	0.79323	0.58824	0.058459	0.00024587	0.01654	Yes
4-aminophenol	0.51765	0.72112	0.58824	0.040002	0.0016191	0.01654	Yes
1,2,4-Benzenetriol	0.52059	0.64312	0.58824	0.038691	0.0071997	0.01654	Yes
glycolic acid	0.55294	0.41648	0.57941	0.026314	0.10856	0.018663	No
Cinnamic acid	0.47647	0.82119	0.57941	0.062059	9.6281e-05	0.018663	Yes
Phenylacetic acid	0.47647	0.83444	0.57647	0.062059	5.8316e-05	0.019415	Yes
4-Hydroxyphenylethanol	0.49412	0.76233	0.57647	0.051723	0.00059641	0.019415	Yes
glutamine	0.46176	0.86534	0.57353	0.071768	1.4967e-05	0.020191	Yes
3-(3-hydroxyphenyl)propionic acid	0.44706	0.84327	0.57353	0.082537	4.0731e-05	0.020191	Yes
Dehydroascorbic Acid	0.49706	0.63282	0.57353	0.050134	0.008514	0.020191	No
azelaic acid	0.46176	0.86681	0.57059	0.071768	1.3916e-05	0.020991	Yes
2-Hydroxyvaleric acid	0.52353	0.78293	0.56471	0.037413	0.00033551	0.022663	Yes
4-HYDROXYPYRIDINE	0.45588	0.79029	0.56176	0.075945	0.00026917	0.023537	Yes
norvaline	0.45	0.59161	0.56176	0.080296	0.015779	0.023537	No
lauric acid	0.52353	0.805	0.56176	0.037413	0.00016869	0.023537	Yes
pentadecanoic acid	0.48235	0.73731	0.56176	0.058459	0.0011172	0.023537	Yes
guanine	0.43529	0.78146	0.56176	0.091952	0.00035027	0.023537	No
Pyrrole-2-Carboxylic Acid	0.49118	0.6078	0.55882	0.05335	0.012503	0.024437	No
hydrocinnamic acid	0.43529	0.86976	0.55882	0.091952	1.1998e-05	0.024437	Yes
Acetol	0.46176	0.83885	0.55882	0.071768	4.8865e-05	0.024437	Yes
glucose	0.50588	0.70346	0.55588	0.045582	0.0023616	0.025362	Yes
naringenin	0.47647	0.71818	0.55	0.062059	0.0017275	0.027294	No
Threitol	0.50294	0.64018	0.54706	0.047063	0.0075575	0.028301	Yes
4-Acetamidobutyric acid	0.46471	0.82855	0.54706	0.069744	7.325e-05	0.028301	Yes
2-Deoxytetronic acid	0.44706	0.60633	0.52941	0.082537	0.012776	0.034952	No
4-hydroxycinnamic acid	0.43824	0.83738	0.52647	0.08953	5.1861e-05	0.036167	No
Glucosaminic acid	0.55882	0.54893	0.52353	0.024437	0.027656	0.037413	Yes
tryptophan	0.42059	0.64165	0.51765	0.10477	0.0073769	0.040002	No
Threonic acid	0.42353	0.70935	0.51471	0.10211	0.0020886	0.041346	No
2-Deoxyuridine	0.45588	0.5872	0.50882	0.075945	0.016779	0.044135	Yes
catechol	0.39412	0.75497	0.50882	0.13091	0.0007227	0.044135	Yes
oxalic acid	0.38824	0.7844	0.50294	0.13728	0.00032126	0.047063	No
Capric Acid	0.40588	0.75938	0.50294	0.11879	0.00064454	0.047063	No
2,4-diaminobutyric acid	0.50294	0.59308	0.50294	0.047063	0.015456	0.047063	No
Elaidic acid	0.38824	0.7535	0.50294	0.13728	0.00075042	0.047063	No
